# Supplementary material
Source: PubMed Central journal article supplement (PMC3252490)
Supplement: NIHMS320909-supplement-1.pdf [file NIHMS320909-supplement-1.pdf]

# Supplementary Figure 1

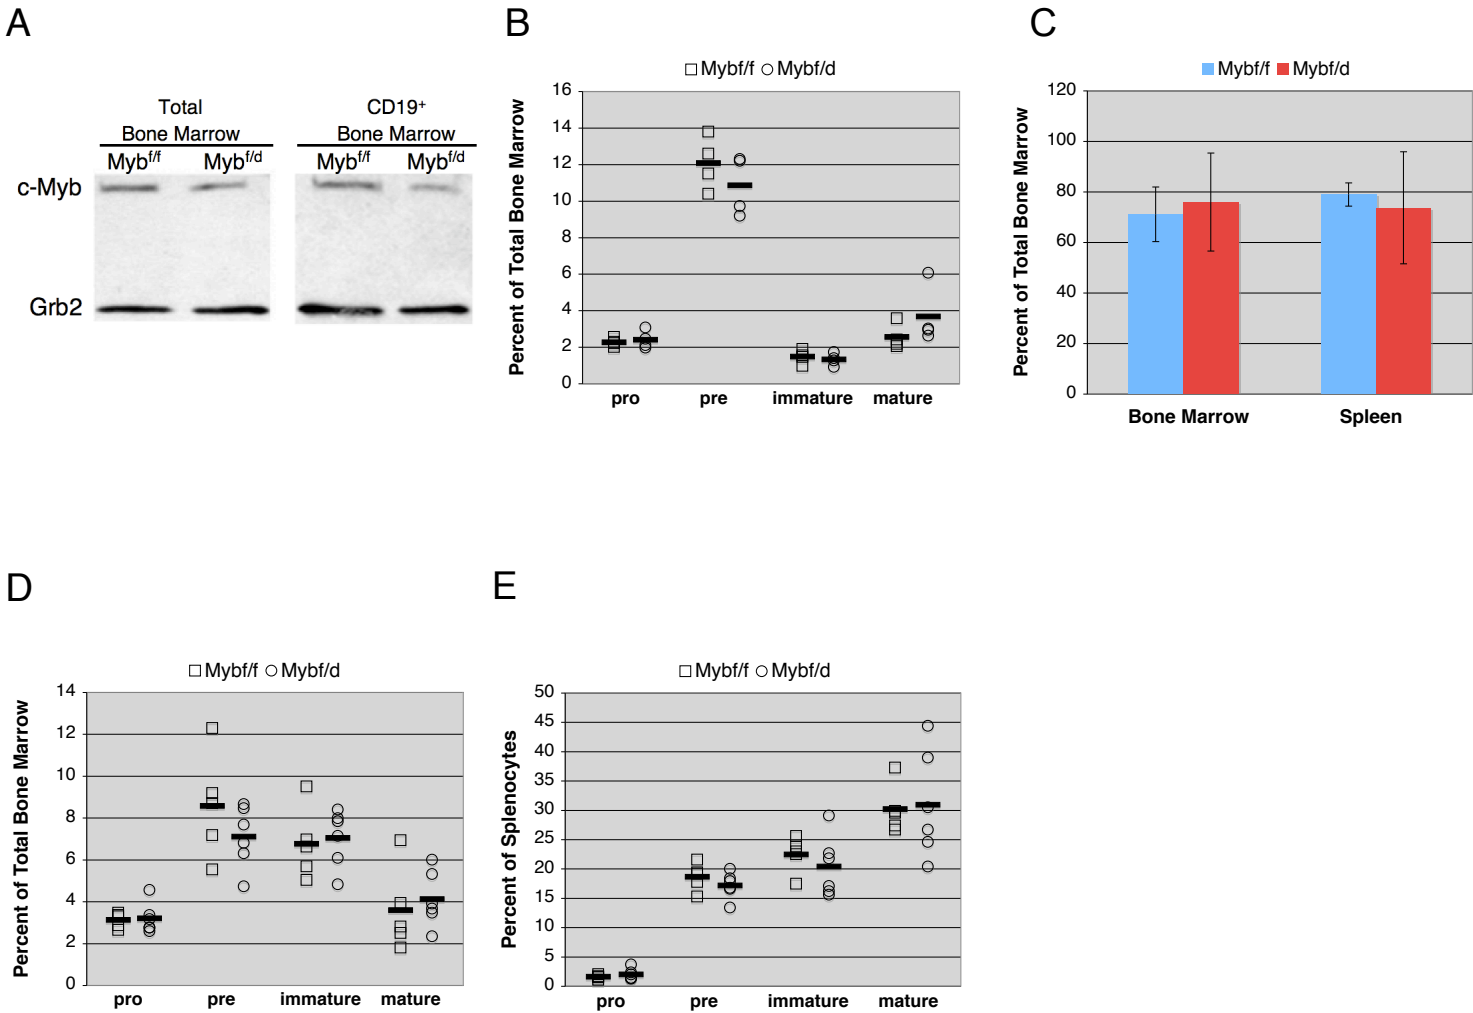

# Supplementary Figure 2

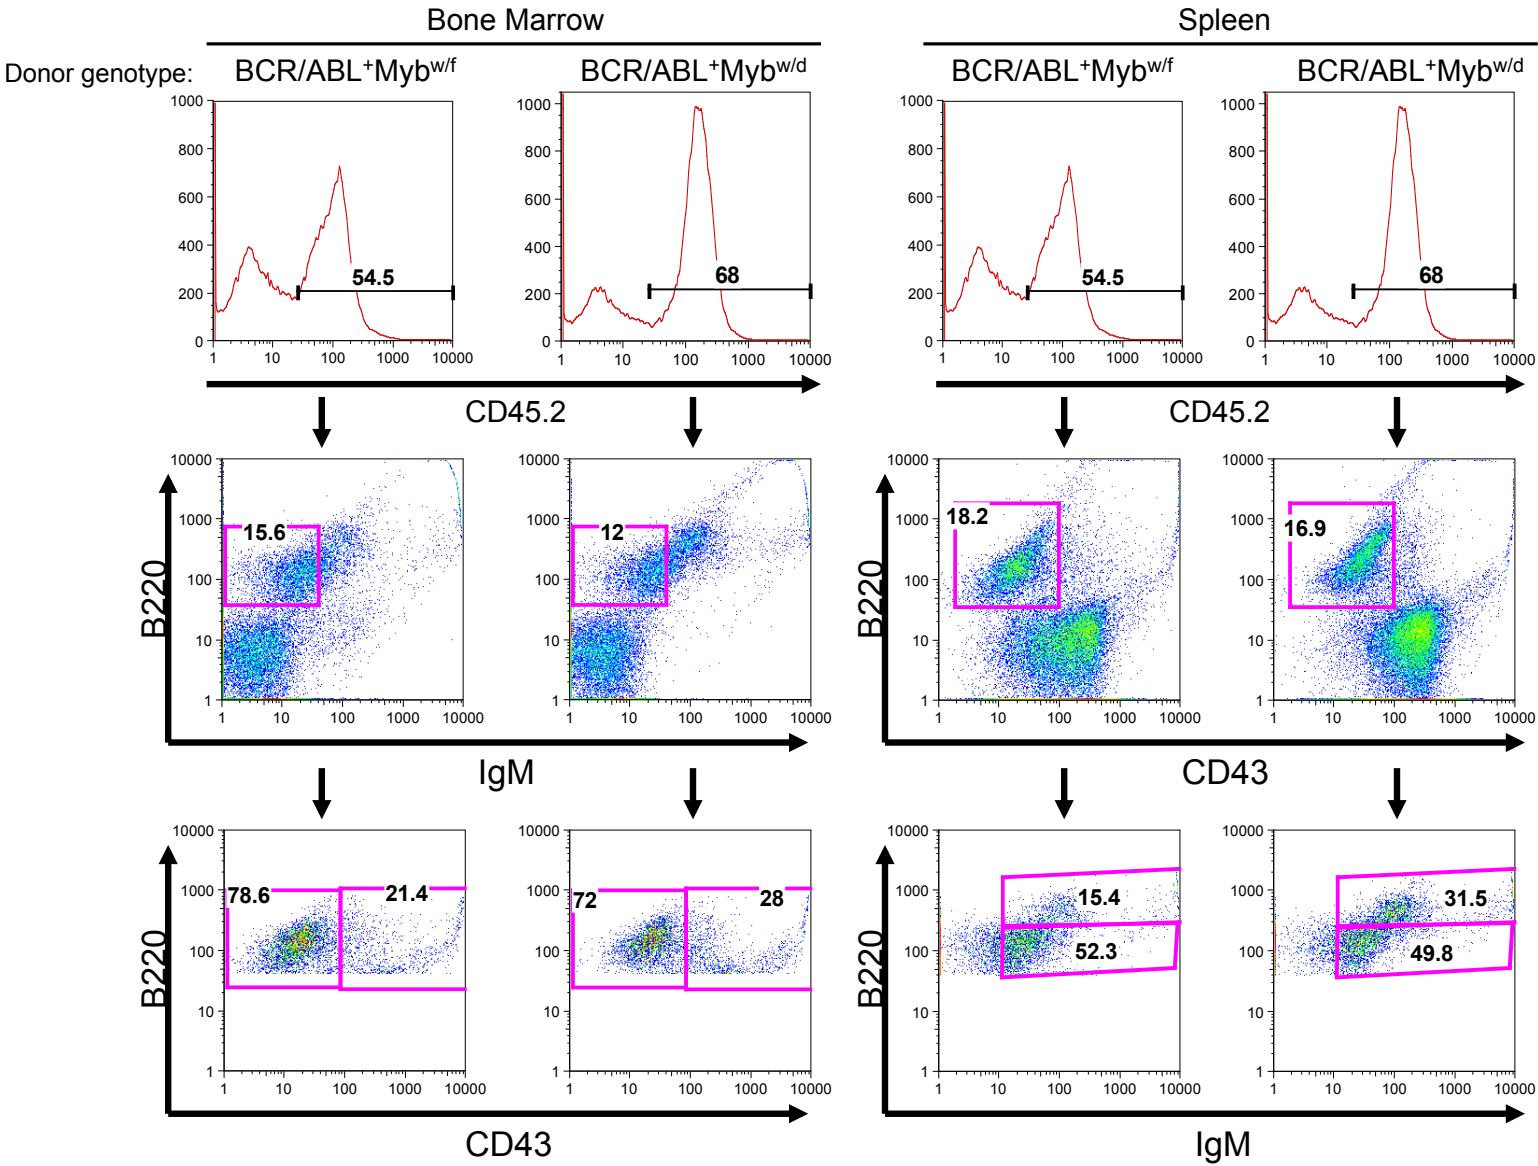

# Supplementary Figure 3

A

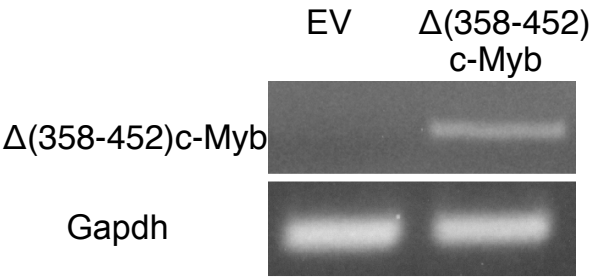

B

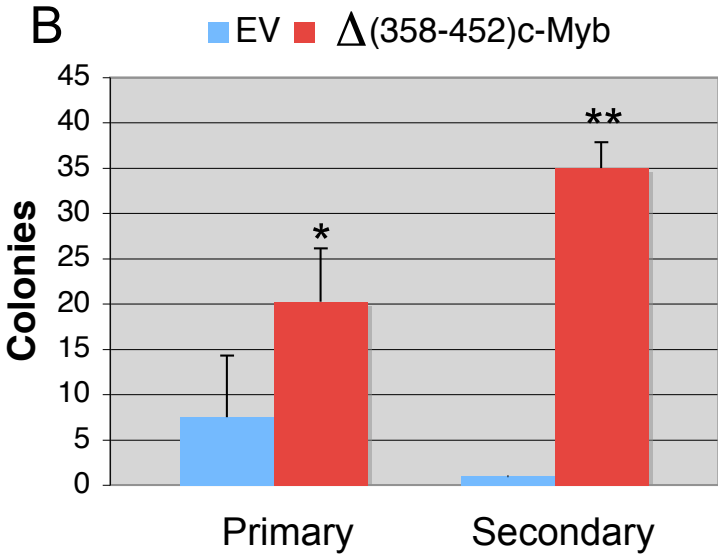



# Supplementary Figure 5

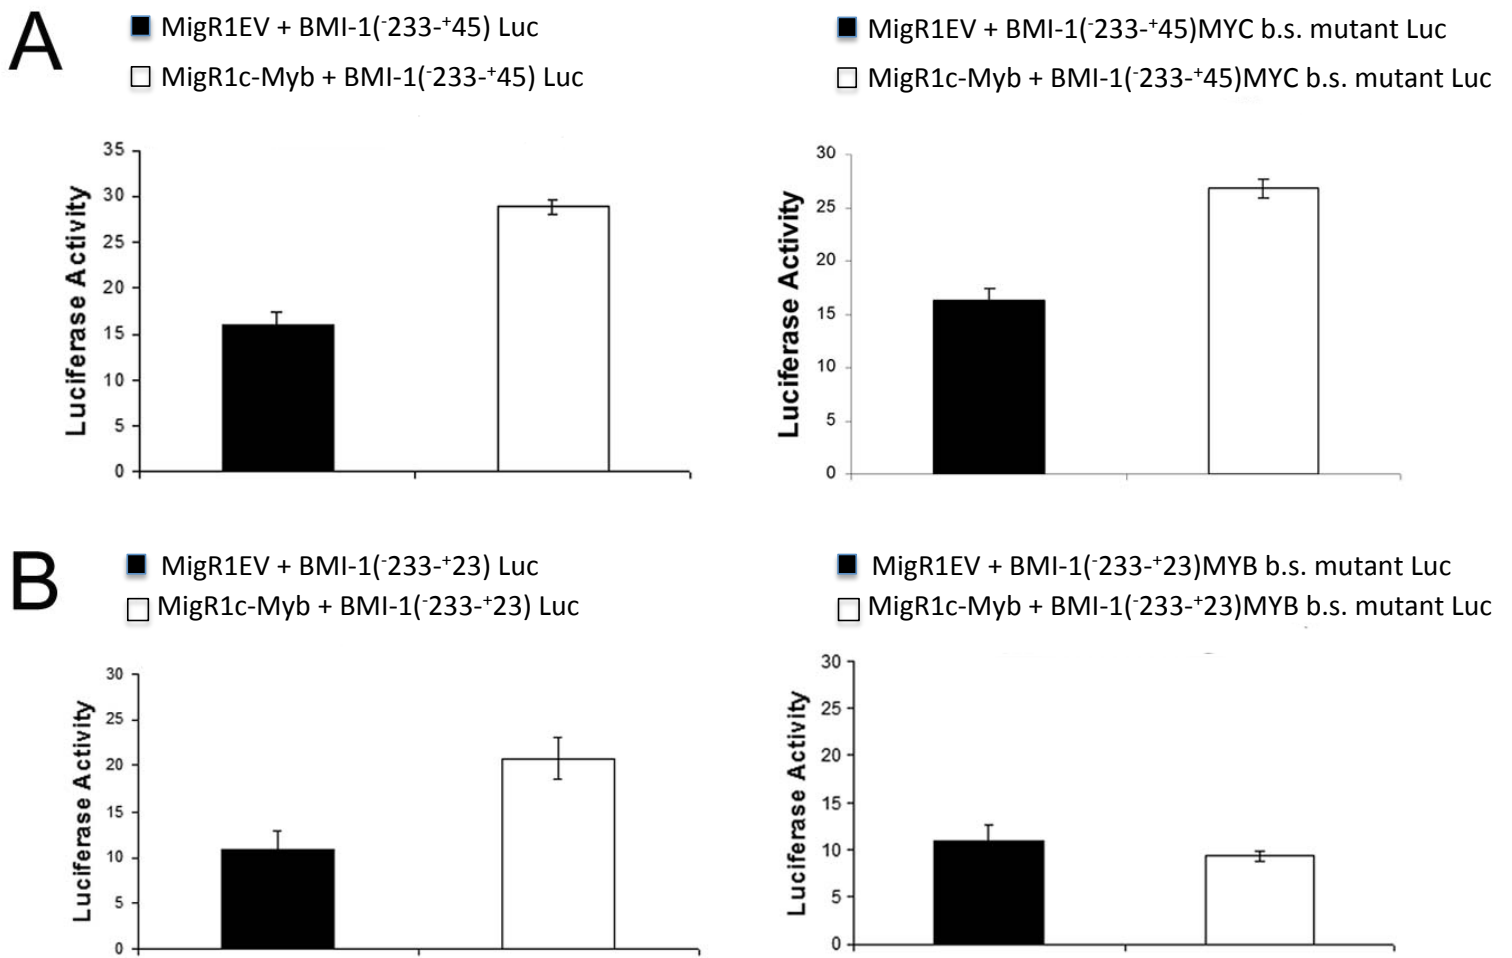

# Supplementary Figure 6

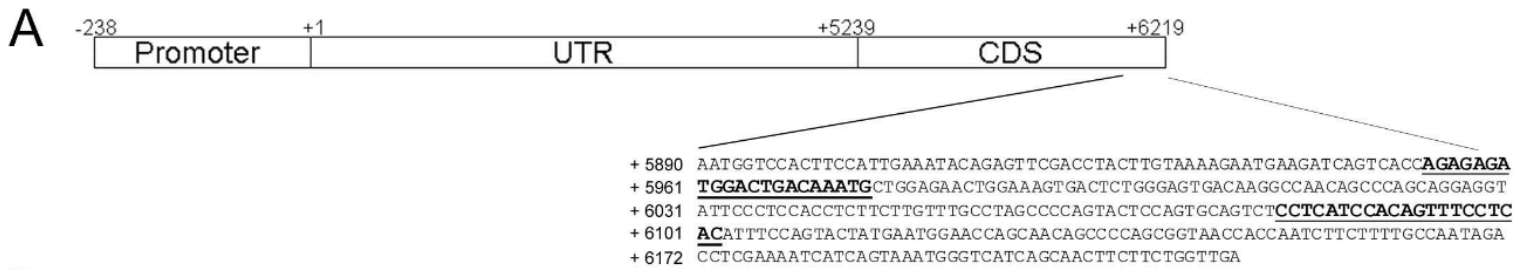

**B**

```

-238
ACGGGCCTGACTACACCGGACTAATTCCCAGGCCGCCCTTAAGGAATGAGGGGAGCAC
GTGACCCGCTGGGGGGGCGCGGGGGGAGGGGGCGGGCGGACTC CGAGCCATTTTGA
-111
GCCGGTGTCA GTTTCCACTCTGCCTTCAGCGGTGCATTTTTTTCCACCC TCCCCTCCCCT
CCTCCCCTCCCCCGCTCGCACGCACACACAGGC GCCCCCCGCCCCGCCCTCCCCCA
+1 +43
CAGCAACTATGAAAATAATCGTAGTATGAGAGGCAGAGATCGGG
    
```

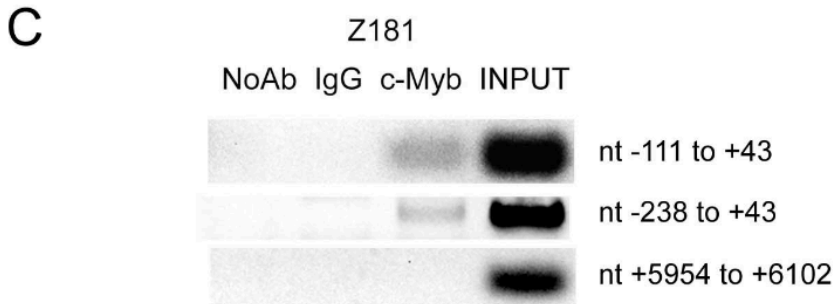

# Supplementary Figure 7

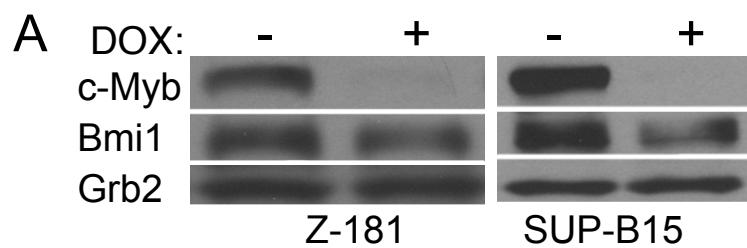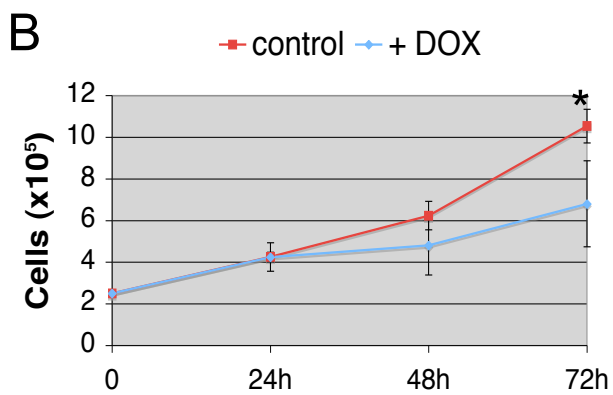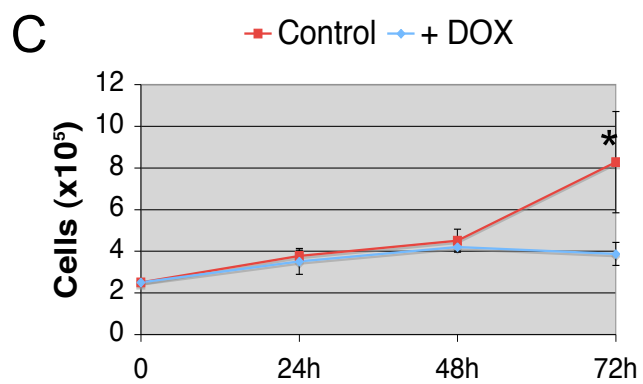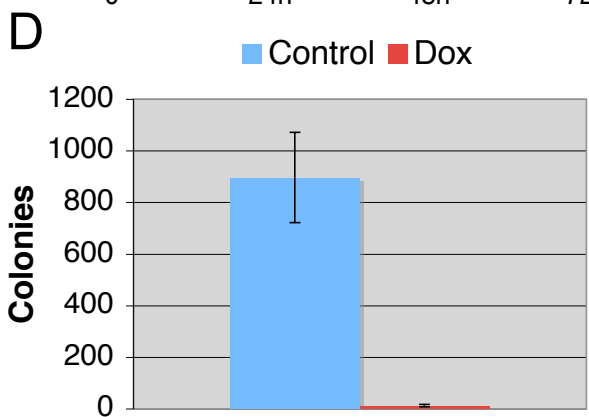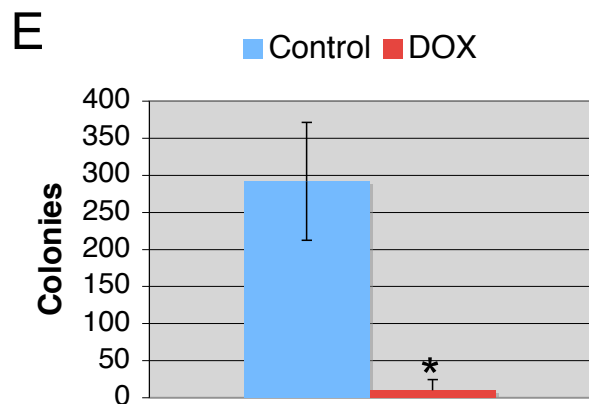

Supplementary Figure 8

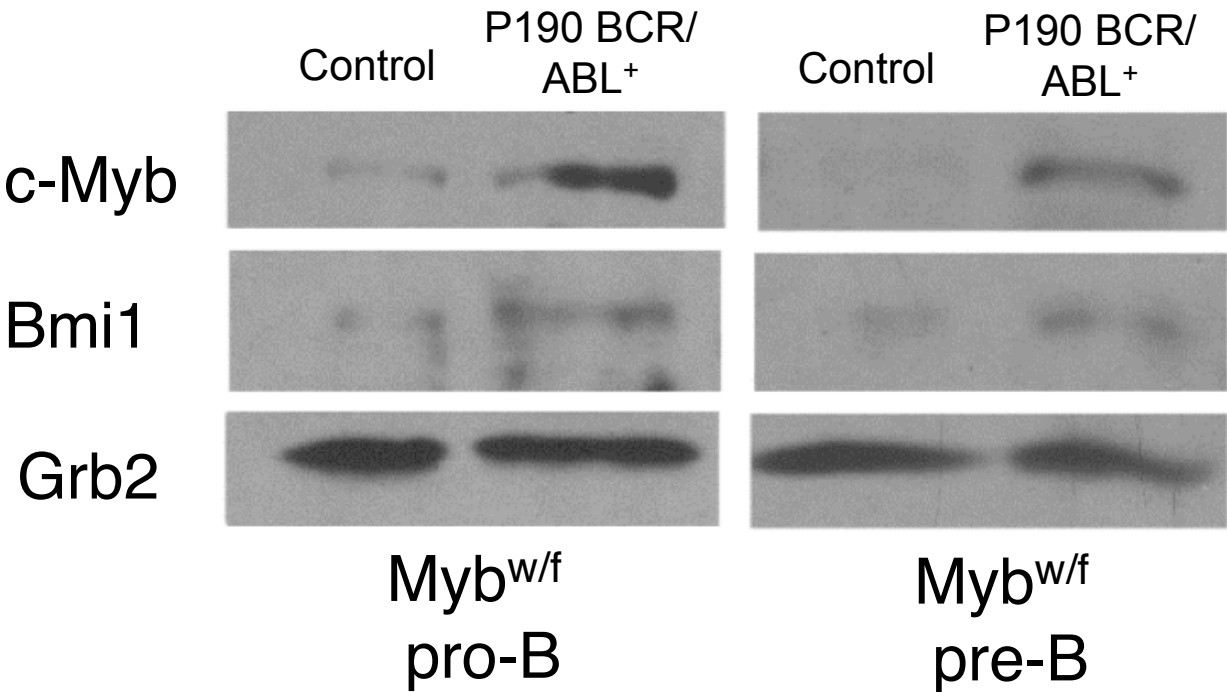



## Supplementary Table 1

Colony formation of bone marrow pro-/pre-B cells with two copies ( $\text{Myb}^{\text{w/f}}$ ) or one copy of c-Myb ( $\text{Myb}^{\text{w/d}}$ ) in the  $\text{BCR/ABL}^+$  and  $\text{BCR/ABL}^-$  background. Means and standard deviations were calculated from 3 separate experiments conducted in triplicate (n=9 for each).

|             | <i>BCR/ABL</i> <sup>+</sup> |                           | <i>BCR/ABL</i> <sup>-</sup> |                           |
|-------------|-----------------------------|---------------------------|-----------------------------|---------------------------|
|             | $\text{Myb}^{\text{w/f}}$   | $\text{Myb}^{\text{w/d}}$ | $\text{Myb}^{\text{w/f}}$   | $\text{Myb}^{\text{w/d}}$ |
| <b>mean</b> | 118                         | 35                        | 39                          | 42                        |
| <b>s.d.</b> | 78                          | 26                        | 20                          | 30                        |

## Supplementary Table 2

Clinical and biological characteristics of 19 adult Ph<sup>+</sup> Acute Lymphoblastic Leukemia patients.

\* CDKN2A status not available for 2 patients

| Variable                           | n (%)        |
|------------------------------------|--------------|
| Total                              | 19           |
| Age (years, median-range)          | 56 (18-76.0) |
| Blast (median)                     | 90 (18-76.0) |
| Gender                             |              |
| Male                               | 11 (58)      |
| Female                             | 8 (42)       |
| Molecular                          |              |
| BCR-ABL <sup>+</sup> p210          | 3 (16)       |
| BCR-ABL <sup>+</sup> p190          | 16 (84)      |
| BCR-ABL <sup>+</sup> p210 and p190 | —            |
| CDKN2A deletion                    |              |
| Homozygous                         | 2 (12)*      |
| Heterozygous                       | 4 (24)*      |

## Supplementary Table 3

Primers used in RQ-PCR analysis.

| Primer description     | Sequence (5' → 3')        |
|------------------------|---------------------------|
| <i>C-Myb</i> sense     | TCAGGAAACTTCTTCTGCTCACA   |
| <i>C-Myb</i> antisense | AGGTTCCCAGGTACTGCT        |
| <i>BMII</i> sense      | TGGAGAAGGAATGGTCCACTTC    |
| <i>BMII</i> antisense  | GTGAGGAAACTGTGGATGAGGA    |
| <i>GAPDH</i> sense     | CCAATATGATTCCAC CCA TGG C |
| <i>GAPDH</i> antisense | CTTGATTTTCGAGGGATCTCGC    |
